# Supplementary material for: Can sleep protect memories from catastrophic forgetting?
Source: eLife journal article supplement (doi:10.7554/elife.51005), 2020-08-03
Supplement: supp [file elife-51005-supp-v1.zip]

Archive with 6 entries (6 files):
- elife_poa_e51005_Transparent_Reporting_File.pdf
- elife_poa_e51005_Figure_2_figure_supplement_1.pdf
- elife_poa_e51005_Figure_4_figure_supplement_1.pdf
- elife_poa_e51005_Figure_5_figure_supplement_1.pdf
- elife_poa_e51005_Figure_7_figure_supplement_1.pdf
- elife_poa_e51005_Figure_7_figure_supplement_2.pdf
