# Supplementary figures and images for: Can sleep protect memories from catastrophic forgetting?
Source: eLife journal article supplement (doi:10.7554/elife.51005), 2020-08-03

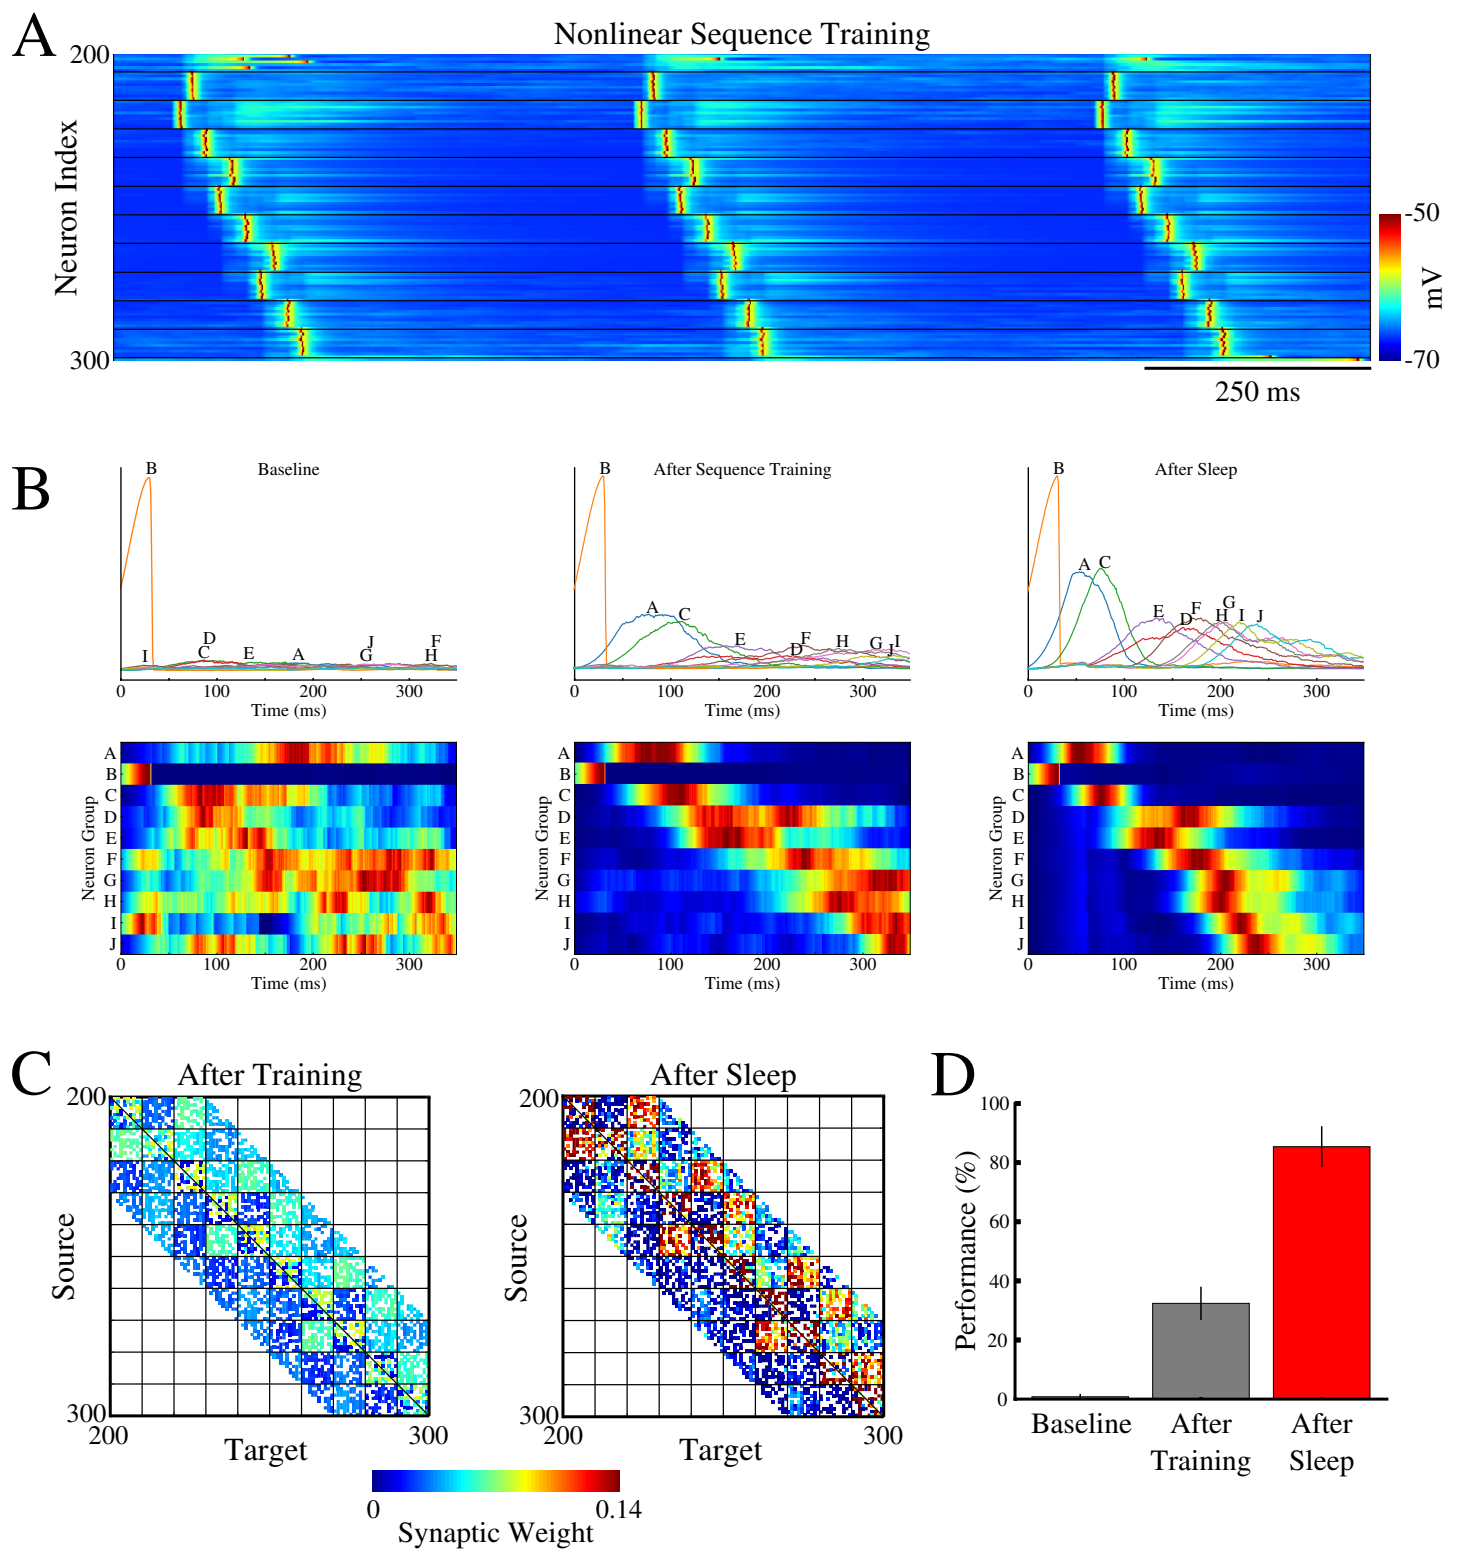

Figure 2- figure supplement 1

Supplement: supp [file elife-51005-supp-v1.zip › elife_poa_e51005_Figure_2_figure_supplement_1.pdf]

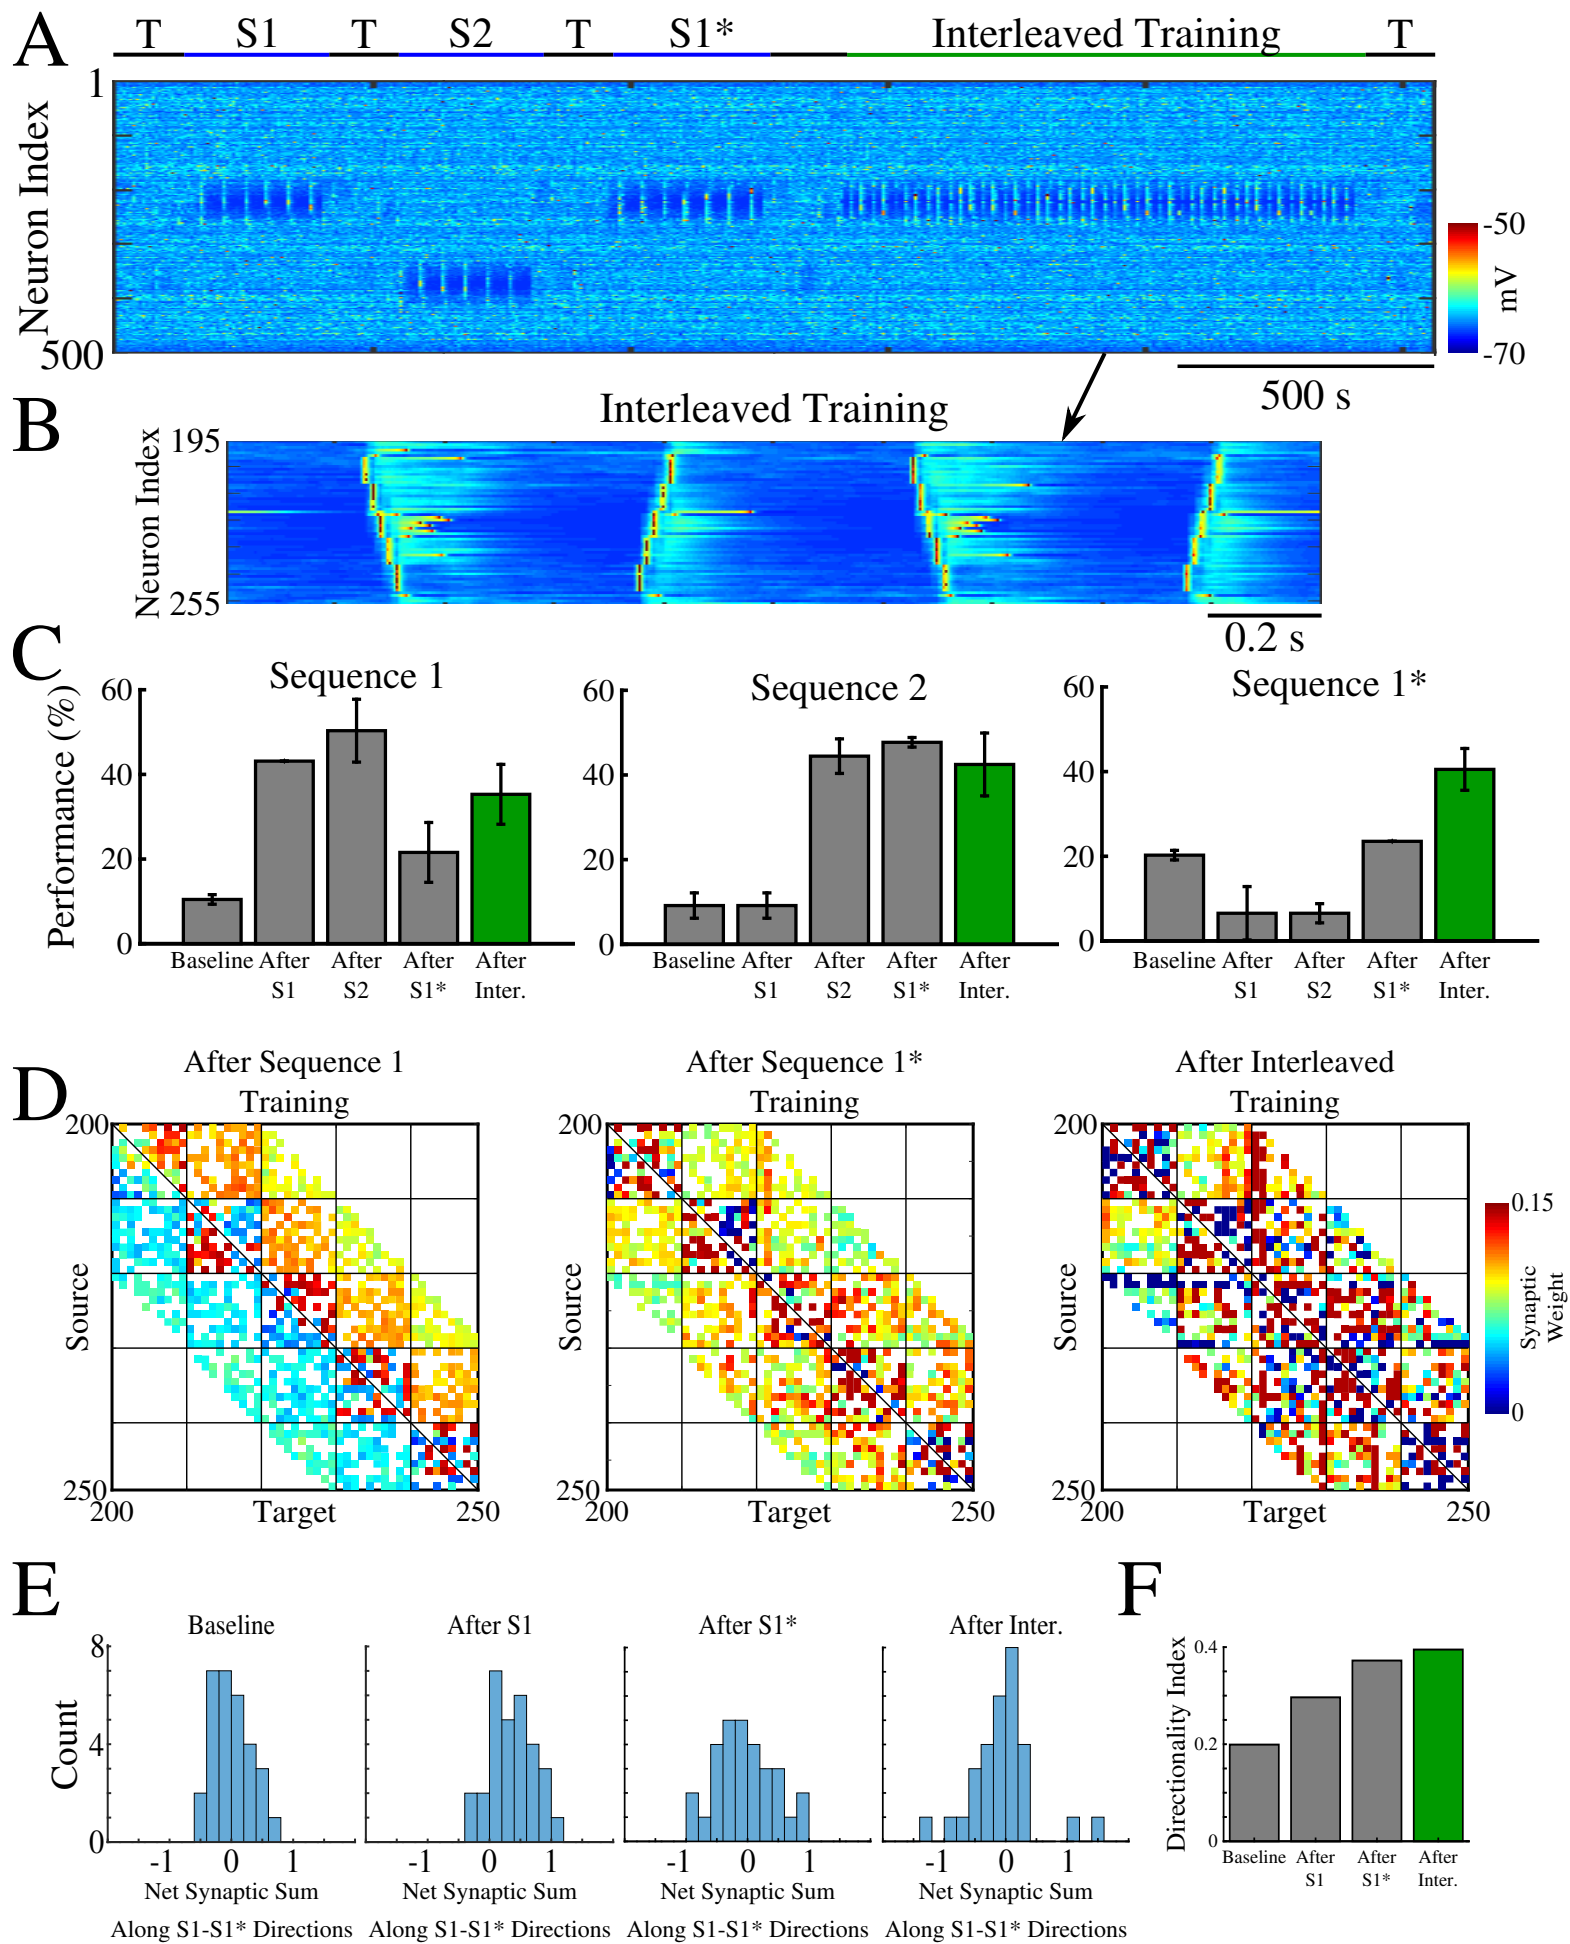

Figure 4 - figure supplement 1

Supplement: supp [file elife-51005-supp-v1.zip › elife_poa_e51005_Figure_4_figure_supplement_1.pdf]

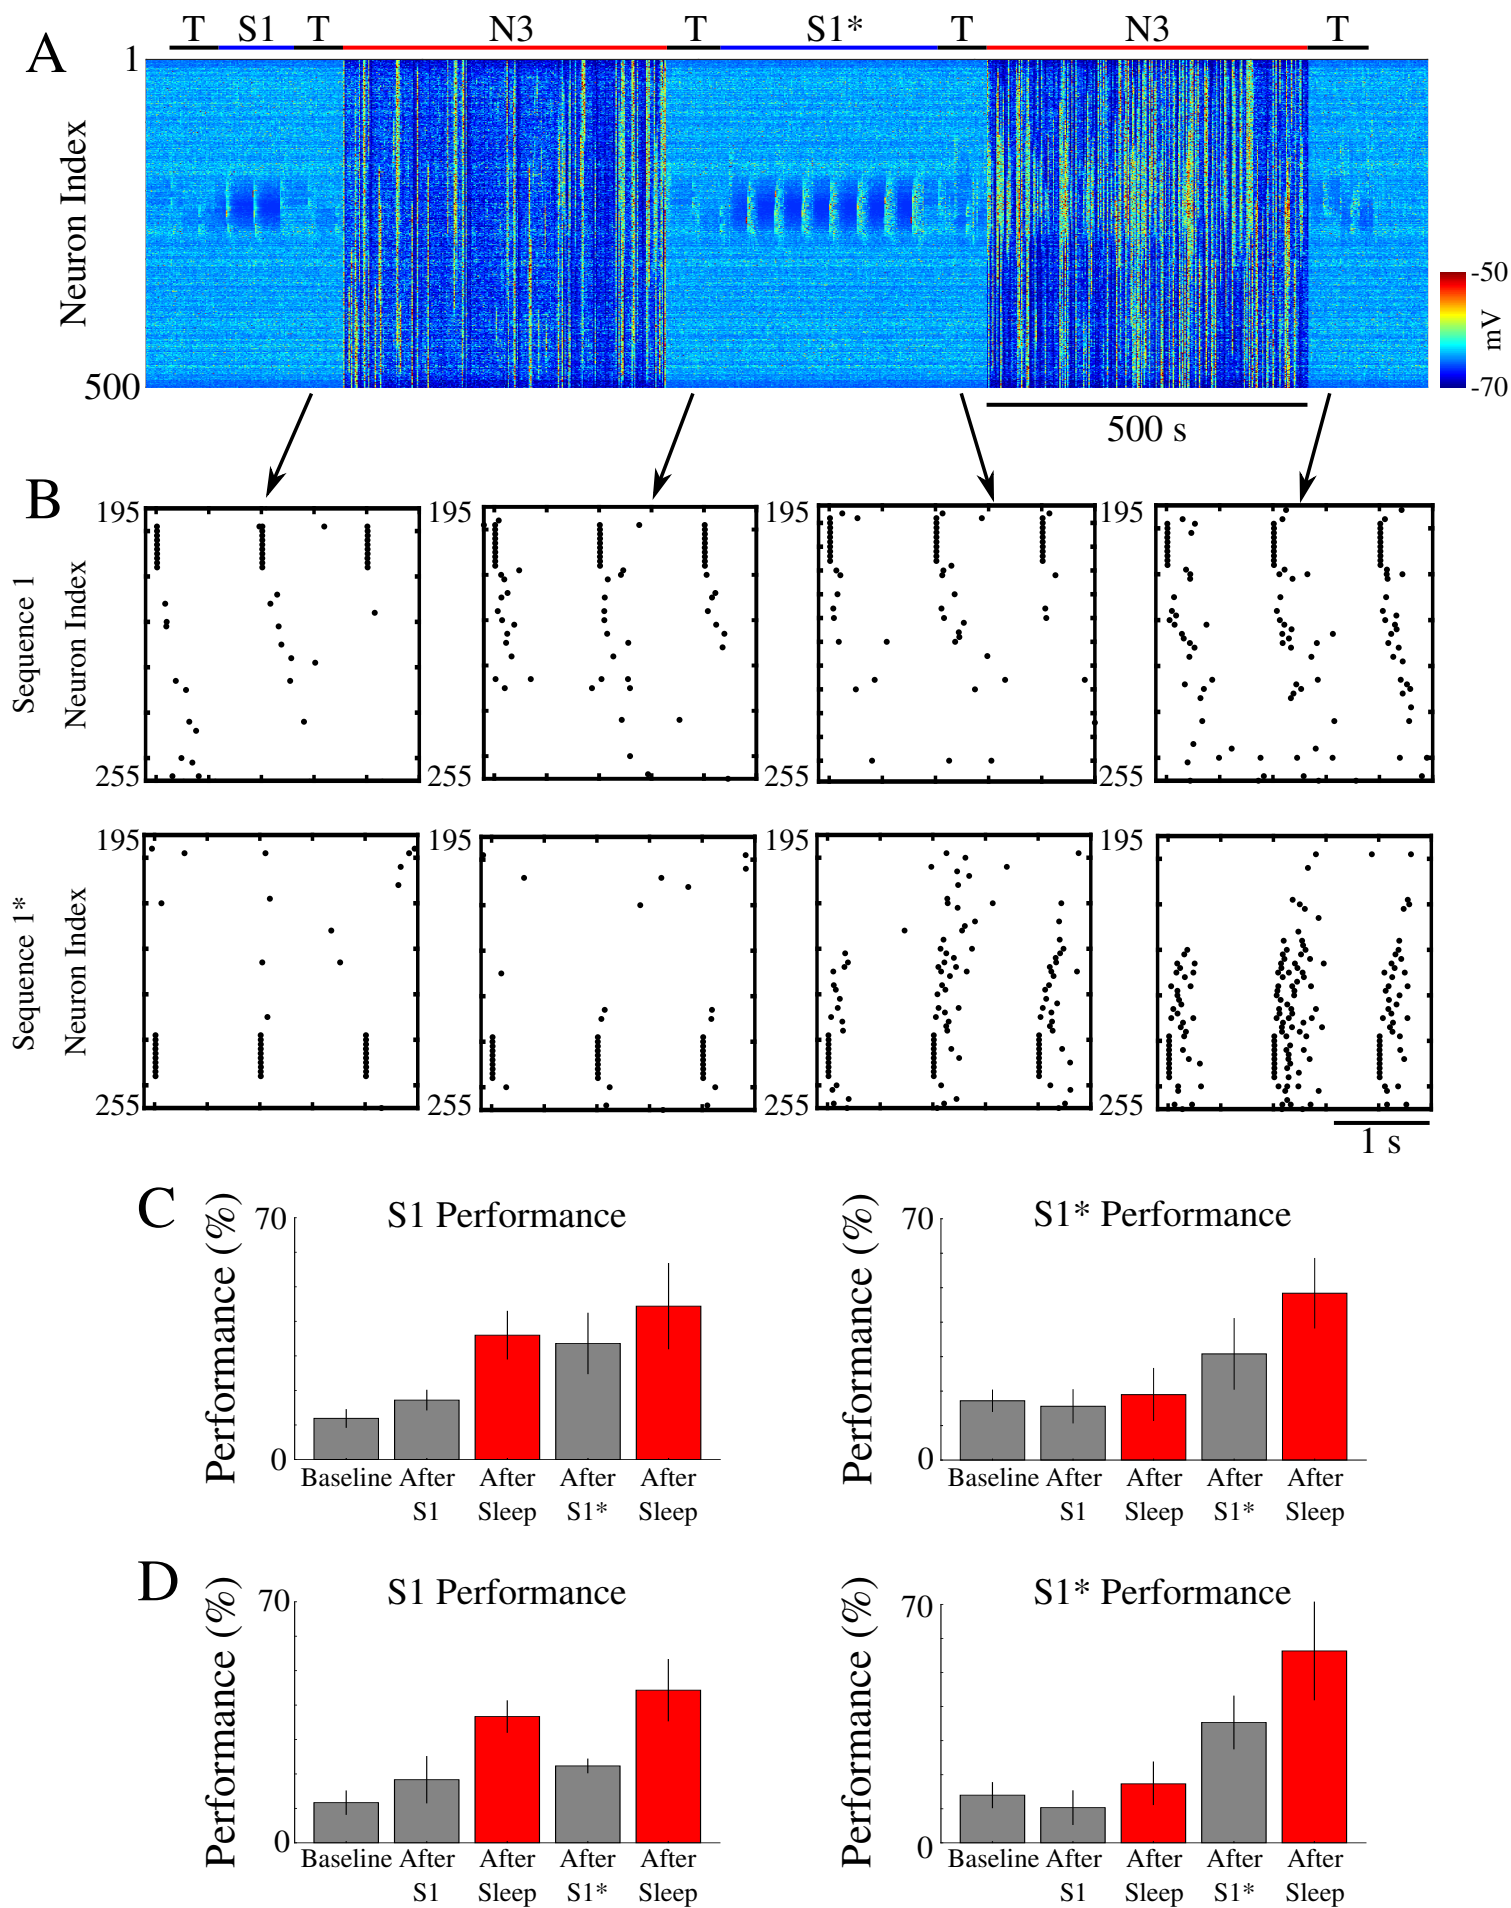

Figure 5 - figure supplement 1

Supplement: supp [file elife-51005-supp-v1.zip › elife_poa_e51005_Figure_5_figure_supplement_1.pdf]

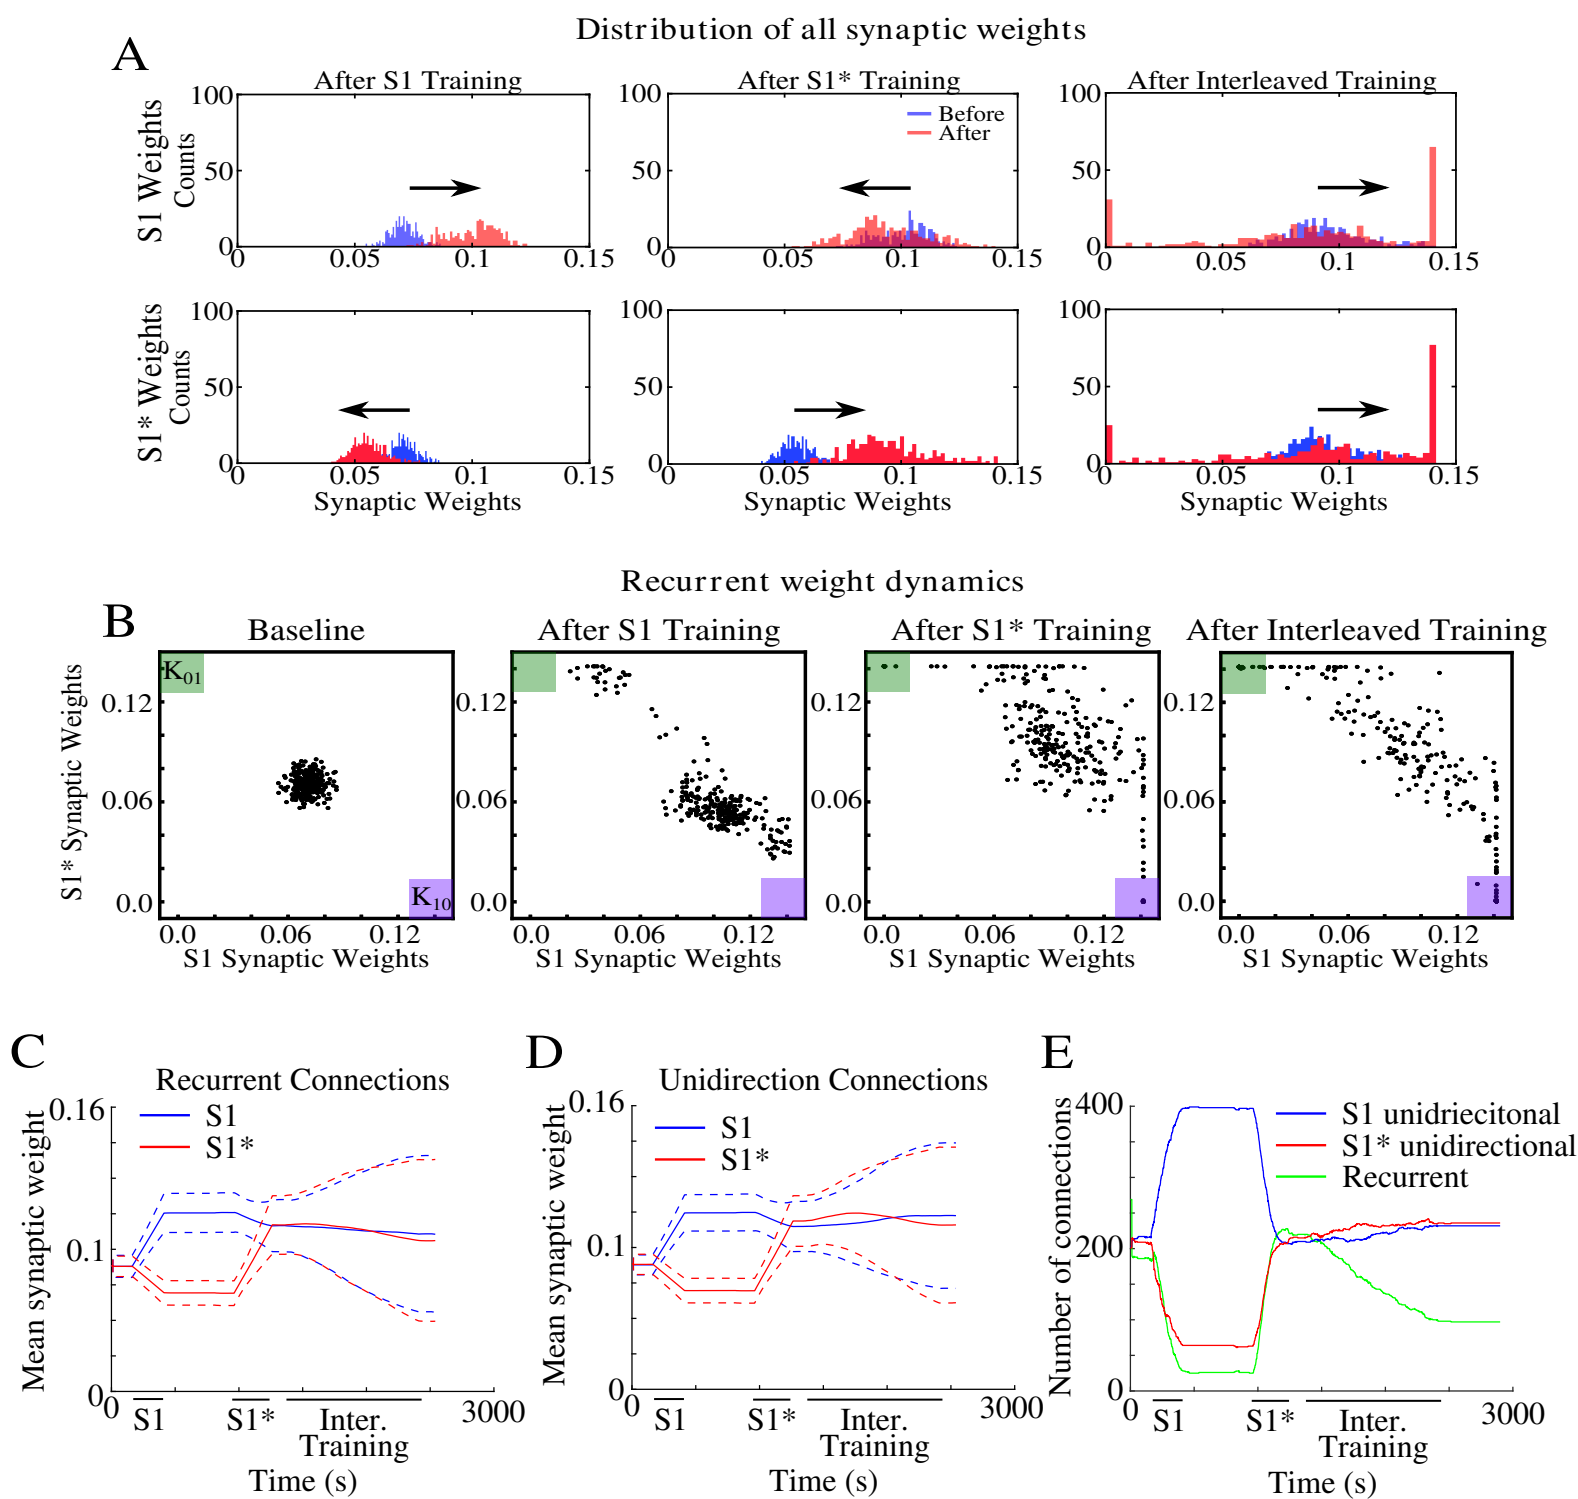

Figure 7 - figure supplement 1

Supplement: supp [file elife-51005-supp-v1.zip › elife_poa_e51005_Figure_7_figure_supplement_1.pdf]

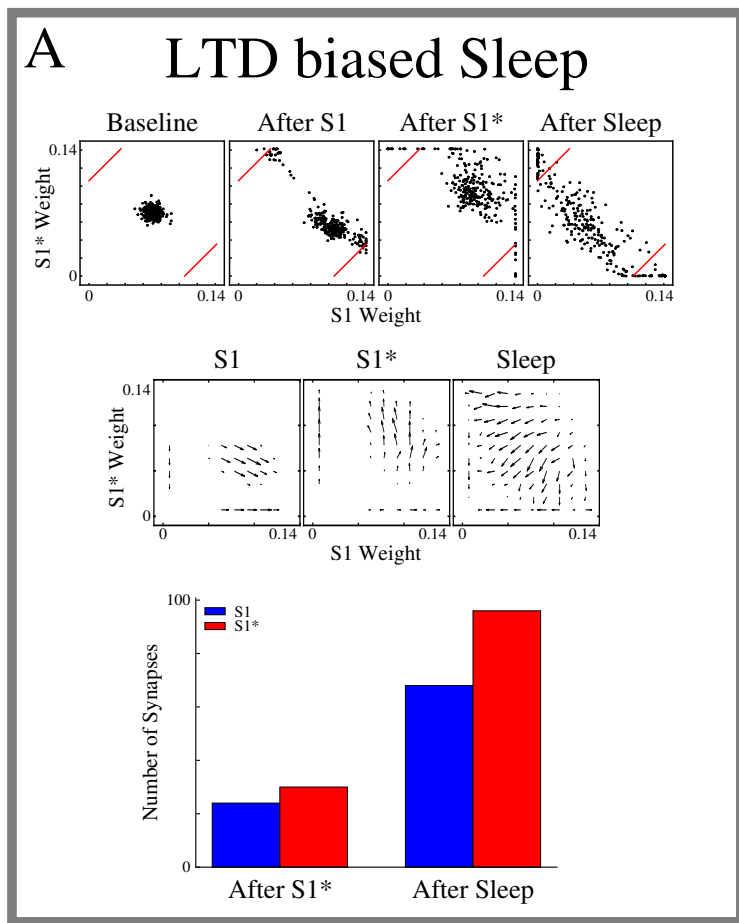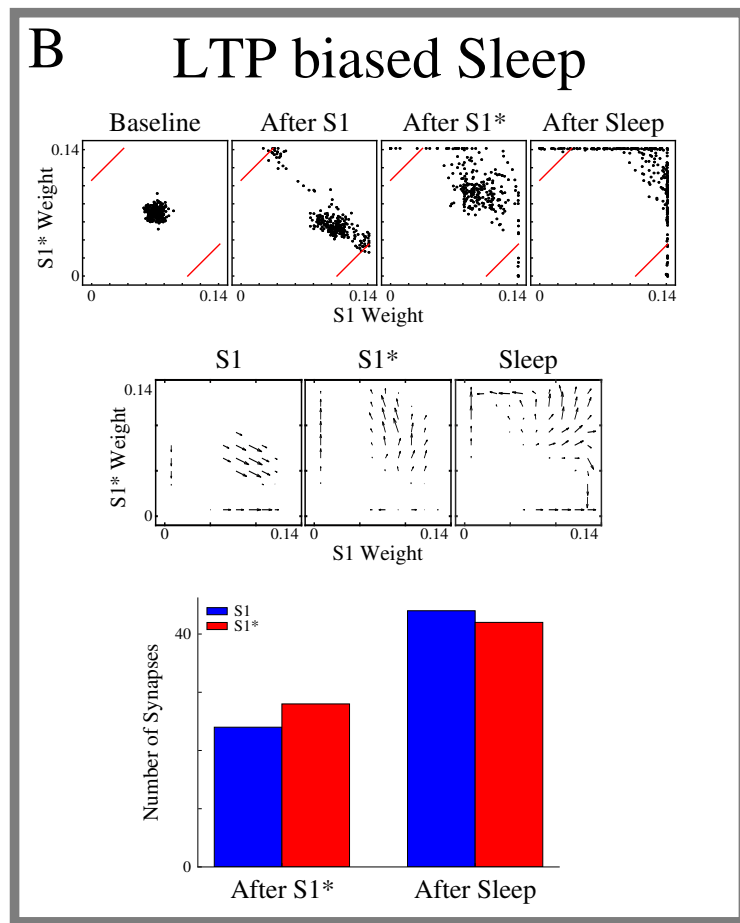

Figure 7 - figure supplement 2

Supplement: supp [file elife-51005-supp-v1.zip › elife_poa_e51005_Figure_7_figure_supplement_2.pdf]
